# Supplementary material
Source: PubMed Central journal article supplement (PMC9659553)
Supplement: mmc1.pdf [file mmc1.pdf]

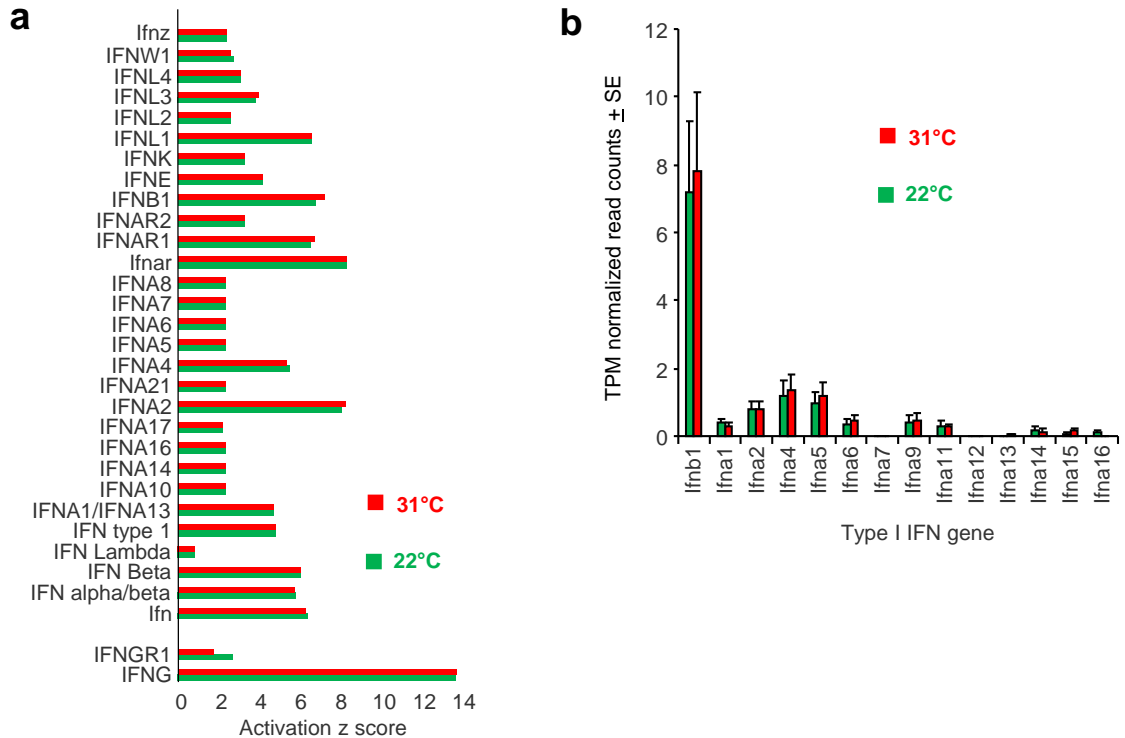

**Supplementary Fig. 1.** (a) Lungs from SARS-CoV-2 infected mice day 2 post infection and held at 22°C or 31°C were compared with lungs from uninfected mice by RNA-Seq. 1164 DEGs (22°C) and 1567 DEGs (31°C) ( $q < 0.05$ ) were analysed by Ingenuity Pathway Analysis Up Stream Regulator (USR) feature and the z-scores for all IFN USRs plotted. Z-scores were almost identical, consistent with a lack of DEGs. (b) Read counts for type I IFN genes.

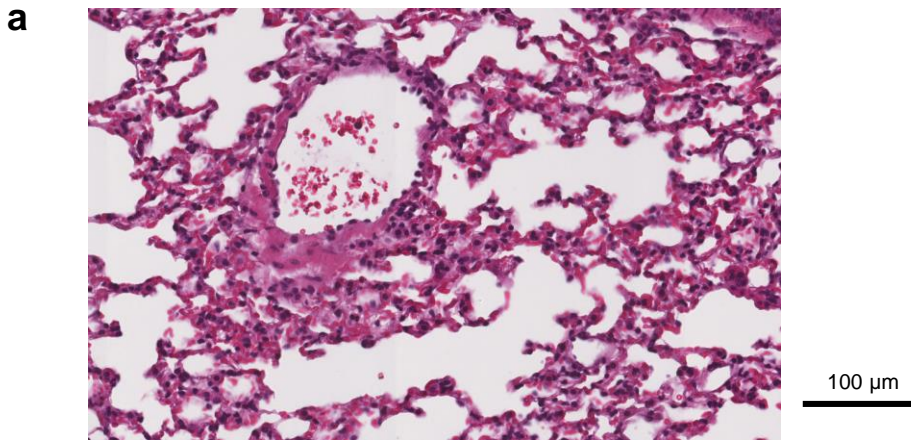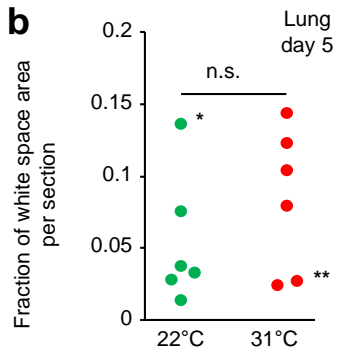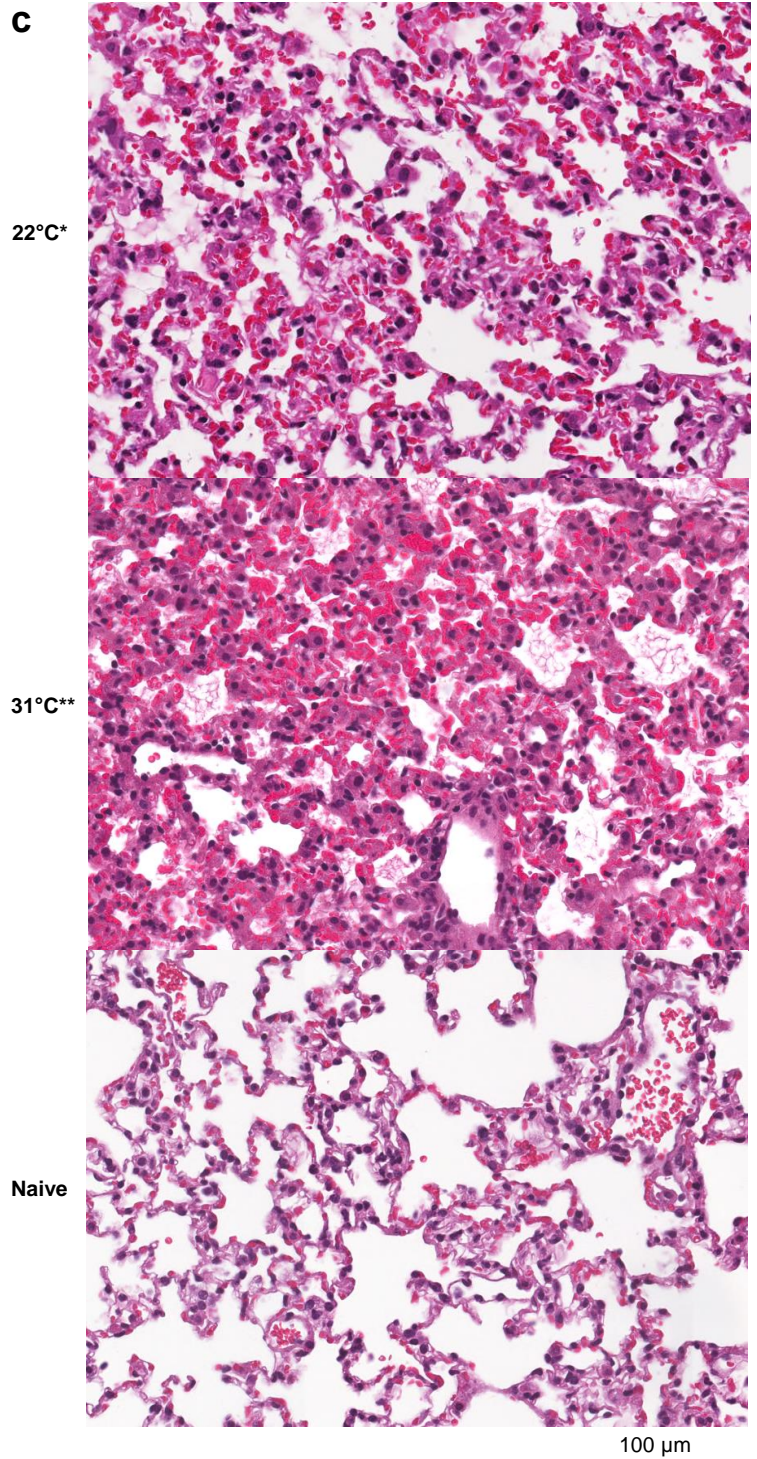

**Supplementary Fig. 2.** (a) H&E staining of lung section from naive K18-hACE2 mouse. (b) White space analysis of lung parenchyma. (c) Examples of H&E staining of lung parenchyma from mice indicated mice in b (\* and \*\*).
